# Supplementary material for: Changes in the stoichiometry of Castanopsis fargesii along an elevation gradient in a Chinese subtropical forest
Source: PeerJ journal article supplement (doi:10.7717/peerj.11553), 2021-06-01

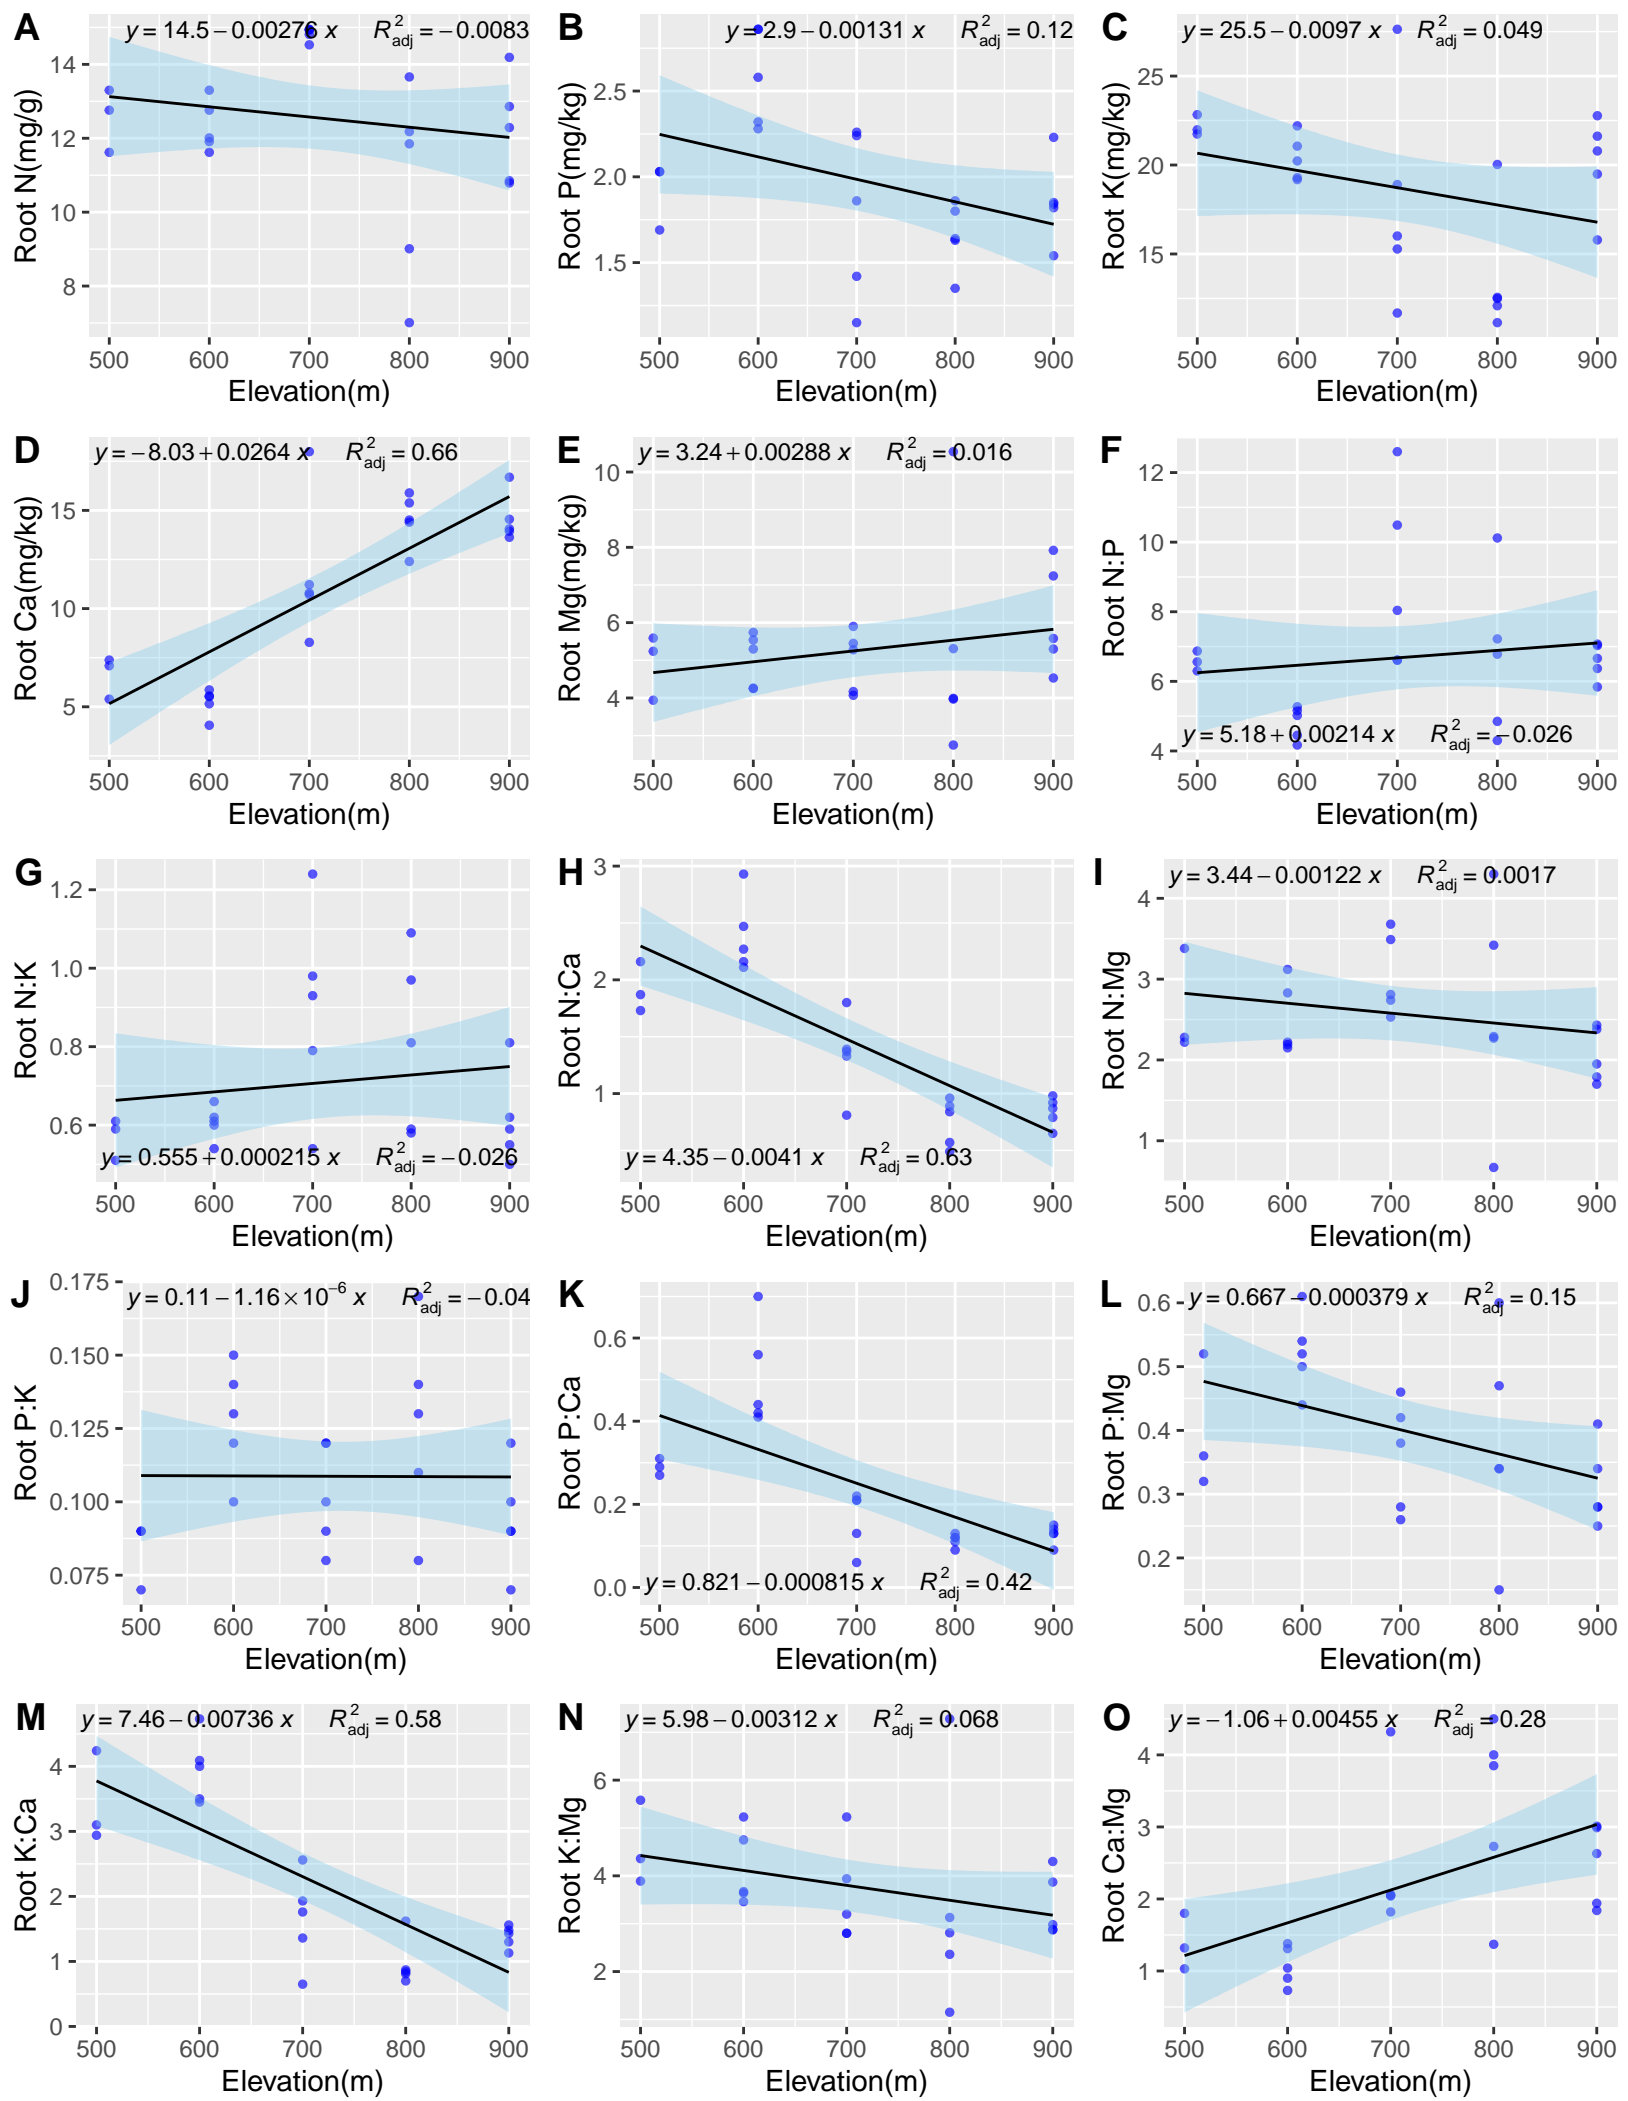

Supplement: Figure_S2_20210330-.pdf [file Figure_S2_20210330-.pdf]
