# Supplementary material for: Changes in the stoichiometry of Castanopsis fargesii along an elevation gradient in a Chinese subtropical forest
Source: PeerJ. 2021 Jun 1;9:e11553. doi: 10.7717/peerj.11553 (PMC8176907; doi:10.7717/peerj.11553)
Supplement: Supplemental Information 1 — The value of R2 greater than 0.16 in each plot indicates significant correlation was detected. [file peerj-09-11553-s001.xlsx]

## Sheet: Leaf
ELE(m)	N	P	K	Ca	Mg	N:P	K:Ca	Ca:Mg	K:Mg	N：K	N:Ca	N:Mg	P:K	P：Ca	P:Mg
500	18.5	2.3378	70.146	52.7607	21.8387	7.91343	1.32951	2.41593	3.21201	0.263736	0.35064	0.847121	0.0333276	0.0443095	0.107049
500	18.7	2.22344	65.909	47.9524	24.6069	8.41038	1.37447	1.94874	2.67848	0.283725	0.38997	0.75995	0.0337351	0.0463678	0.0903586
500	17.6	2.28141	70.9001	55.1083	19.2145	7.71452	1.28656	2.86806	3.68993	0.248237	0.319371	0.915975	0.0321779	0.0413987	0.118734
600	14.4	2.02854	77.335	36.1464	16.7151	7.09869	2.13949	2.1625	4.62666	0.186203	0.39838	0.861498	0.0262306	0.0561202	0.12136
600	13.6	1.84022	67.9326	25.7313	13.2289	7.39041	2.64008	1.94508	5.13515	0.200198	0.528539	1.02805	0.0270889	0.0715169	0.139106
600	13.6	1.96313	78.674	28.869	14.8858	6.92771	2.72521	1.93937	5.28518	0.172865	0.471094	0.913624	0.0249527	0.0680014	0.13188
600	13.7	2.03673	75.5104	21.3049	16.9093	6.72648	3.54427	1.25996	4.46562	0.181432	0.643043	0.810206	0.0269728	0.0955988	0.12045
600	13.66	1.75396	54.1367	28.8951	15.7189	7.78807	1.87356	1.83824	3.44405	0.252324	0.472745	0.869018	0.0323988	0.0607012	0.111583
700	14.7	2.01758	73.7628	39.0546	21.3811	7.28594	1.88871	1.82659	3.44991	0.199287	0.376396	0.687523	0.0273523	0.0516606	0.0943629
700	15.4	2.09167	96.2021	23.2621	18.9058	7.36254	4.13556	1.23042	5.08849	0.16008	0.66202	0.814563	0.0217425	0.0899173	0.110636
700	15.9	1.80994	73.5654	41.3186	25.0637	8.7848	1.78044	1.64854	2.93513	0.216134	0.384814	0.634383	0.0246032	0.0438046	0.0722137
700	14.82	1.70887	66.4737	30.7436	18.8397	8.67241	2.1622	1.63185	3.52838	0.222945	0.482052	0.786637	0.0257074	0.0555845	0.0907057
700	15	1.90777	82.8996	22.847	14.7379	7.86257	3.62848	1.55022	5.62492	0.180942	0.656543	1.01778	0.023013	0.0835023	0.129447
800	14.875	2.01355	101.793	40.3217	14.4175	7.38746	2.52452	2.79671	7.06035	0.14613	0.368908	1.03173	0.0197808	0.0499371	0.13966
800	14.1	1.95839	87.1763	36.0239	11.7456	7.19979	2.41996	3.06701	7.42204	0.161741	0.391407	1.20045	0.0224647	0.0543637	0.166734
800	14.7	2.01355	101.793	42.1947	14.5175	7.30055	2.41246	2.90648	7.01175	0.144411	0.348385	1.01257	0.0197808	0.0477204	0.138698
800	14.875	2.09153	122.281	46.4513	16.4286	7.11203	2.63244	2.82746	7.44314	0.121647	0.320228	0.905432	0.0171043	0.0450262	0.12731
800	14.6	2.1695	129.009	36.6169	14.9784	6.72965	3.52322	2.44464	8.61301	0.11317	0.398723	0.974735	0.0168166	0.0592487	0.144842
900	13.98	1.92822	79.3654	72.3305	21.1078	7.25021	1.09726	3.42672	3.76	0.176147	0.19328	0.662315	0.0242955	0.0266585	0.0913512
900	13.4	1.84522	77.196	63.7097	17.1841	7.262	1.21168	3.70749	4.4923	0.173584	0.210329	0.779792	0.0239031	0.0289629	0.10738
900	12.8	2.08983	91.6526	63.1824	14.8061	6.1249	1.4506	4.26732	6.19019	0.139658	0.202588	0.864508	0.0228016	0.0330761	0.141146
900	12.6	1.87817	80.7264	53.5333	16.6357	6.70864	1.50797	3.21797	4.8526	0.156083	0.235368	0.757407	0.0232659	0.0350842	0.1129
900	13.98	1.93871	78.6007	51.4947	20.1024	7.21099	1.52639	2.56162	3.91002	0.177861	0.271484	0.69544	0.0246653	0.0376487	0.0964417

## Sheet: Root
ELE	N	P	K	Ca	Mg	Root N:P	Root N:K	Root N:Ca	Root N:Mg	Root P:K	Root P:Ca	Root P:Mg	Root K:Ca	Root K:Mg	Root Ca:Mg
500	11.6249	1.69277	22.8296	5.38586	5.24178	6.86735	0.509202	2.1584	2.21773	0.0741483	0.314299	0.322939	4.2388	4.35531	1.02749
500	12.7554	2.02611	21.7439	7.38399	5.59487	6.29551	0.58662	1.72744	2.27984	0.0931807	0.274392	0.362137	2.94473	3.88639	1.31978
500	13.2989	2.02795	21.9812	7.09458	3.93747	6.5578	0.605011	1.87451	3.37752	0.0922583	0.285845	0.515039	3.09831	5.58258	1.80181
600	11.9073	2.85638	19.1832	4.05962	5.54229	4.16865	0.620714	2.9331	2.14844	0.1489	0.703608	0.51538	4.72536	3.46124	0.732482
600	11.6249	2.31785	19.2893	5.51603	5.29685	5.01537	0.602659	2.10747	2.19468	0.120162	0.420202	0.43759	3.49695	3.64165	1.04138
600	12.7554	2.86342	21.0554	5.1538	5.74128	4.45459	0.6058	2.47495	2.2217	0.135995	0.555594	0.498743	4.08542	3.66737	0.897674
600	13.2989	2.57903	20.2326	5.86205	4.26104	5.15654	0.657299	2.26864	3.12104	0.127469	0.439953	0.605259	3.45145	4.74828	1.37573
600	12.0092	2.27805	22.2007	5.54947	4.24685	5.27169	0.540937	2.16402	2.82779	0.102612	0.410499	0.53641	4.00051	5.22758	1.30673
700	14.8062	2.24083	27.6264	10.7973	5.27738	6.60746	0.535945	1.37129	2.8056	0.0811121	0.207536	0.424611	2.55863	5.23486	2.04596
700	14.9374	2.26057	18.9021	10.7138	5.90038	6.60778	0.79025	1.39422	2.53159	0.119594	0.210996	0.383123	1.76427	3.20354	1.81578
700	14.9477	1.86017	16.0122	8.28385	4.06507	8.03564	0.933515	1.80443	3.67709	0.116172	0.224554	0.457598	1.93295	3.93898	2.03781
700	14.9326	1.42303	15.2753	11.218	5.44984	10.4935	0.977565	1.33113	2.74001	0.093159	0.126853	0.261115	1.36168	2.80289	2.05841
700	14.5324	1.15357	11.6814	17.9897	4.16546	12.5978	1.24406	0.807819	3.4888	0.0987526	0.0641238	0.276937	0.649338	2.80435	4.31879
800	11.8475	1.64013	20.0277	12.396	2.75278	7.22352	0.591557	0.955751	4.30383	0.0818931	0.132311	0.595807	1.61565	7.27542	4.50308
800	9.01326	1.85896	11.1417	15.891	3.97095	4.84856	0.808967	0.567194	2.2698	0.166847	0.116982	0.468139	0.701133	2.8058	4.00181
800	13.6633	1.35048	12.4935	15.3752	3.99203	10.1173	1.09363	0.888659	3.42264	0.108095	0.0878353	0.338295	0.812576	3.12961	3.85147
800	12.1778	1.79588	12.5591	14.5146	5.31368	6.78095	0.969635	0.838999	2.29178	0.142994	0.123729	0.337973	0.865273	2.36354	2.73156
800	7.01194	1.62892	12.0852	14.3964	10.539	4.30467	0.580207	0.487063	0.665336	0.134786	0.113148	0.154561	0.839463	1.14672	1.36602
900	12.2873	1.84404	20.7861	14.065	7.23865	6.66324	0.591132	0.873609	1.69746	0.0887154	0.131109	0.25475	1.47786	2.87154	1.94304
900	10.8542	1.54315	21.6153	16.691	5.57982	7.03382	0.502156	0.650305	1.94527	0.0713916	0.0924541	0.276559	1.29503	3.87383	2.99131
900	12.8559	1.81762	15.7947	13.9389	5.29758	7.07294	0.81394	0.922301	2.42675	0.115078	0.130399	0.343104	1.13313	2.98149	2.63119
900	14.1895	2.22754	22.7667	14.549	7.91534	6.37005	0.623258	0.975292	1.79266	0.097842	0.153106	0.281421	1.56483	2.87628	1.83808
900	10.7906	1.84651	19.4908	13.6324	4.53029	5.84376	0.553625	0.791541	2.38187	0.0947378	0.135451	0.407593	1.42974	4.30232	3.00916

## Sheet: Soil
soil A (0-20cm)
elevation	N	P	K	Ca	Mg	N:P	N:K	N:Ca	N:Mg	P:K	P:Ca	P:Mg	K:Ca	K:Mg	Ca:Mg
500	2.3	0.248177	18.0953	1.63337	2.41366	9.26756	0.127105	1.40813	0.952909	0.013715	0.151942	0.102822	11.0785	7.49704	0.67672
500	2.1	0.626899	51.2011	2.57837	5.91389	3.34982	0.0410147	0.814469	0.355096	0.0122439	0.243138	0.106004	19.858	8.65777	0.435985
500	1.2	0.709233	56.0697	0.941252	9.34529	1.69197	0.0214019	1.2749	0.128407	0.0126491	0.7535	0.075892	59.5693	5.99978	0.100719
600	2.8	0.429479	85.8347	1.80288	7.04441	6.51953	0.0326208	1.55307	0.397478	0.00500356	0.238219	0.0609673	47.6099	12.1848	0.25593
600	2.4	0.728612	89.9247	2.2837	9.18147	3.29394	0.026689	1.05093	0.261396	0.00810246	0.319049	0.0793567	39.3768	9.79415	0.248729
600	1.7	0.554168	84.7824	2.12985	8.84807	3.06766	0.0200513	0.798177	0.192132	0.00653635	0.26019	0.0626315	39.8067	9.58202	0.240714
600	3	0.427938	73.8966	0.781977	7.72658	7.01036	0.0405973	3.83643	0.38827	0.00579103	0.547252	0.0553852	94.4998	9.56395	0.101206
600	2.1	0.516529	70.5425	1.29685	7.22671	4.0656	0.0297693	1.61931	0.290589	0.00732224	0.398294	0.071475	54.3952	9.76136	0.179453
700	3.4	0.312083	57.7911	0.871764	4.63899	10.8946	0.0588326	3.90014	0.732918	0.00540018	0.357989	0.0672738	66.2921	12.4577	0.187921
700	2.5	0.27067	46.8317	0.788008	4.05281	9.23634	0.0533826	3.17256	0.616856	0.00577963	0.343486	0.0667857	59.4305	11.5554	0.194435
700	2.4	0.393664	66.7523	0.988185	5.07179	6.09657	0.0359538	2.42869	0.473205	0.00589738	0.398371	0.0776183	67.5504	13.1615	0.194839
700	2.1	0.338228	26.2364	0.630864	3.19501	6.20884	0.0800413	3.32877	0.657274	0.0128915	0.536134	0.105861	41.5881	8.21169	0.197453
700	2.1	0.335195	45.2055	0.889296	3.70987	6.265	0.0464546	2.36142	0.566058	0.00741493	0.376922	0.0903523	50.8329	12.1852	0.239711
800	3.3	0.405153	63.4619	0.947087	4.37094	8.14507	0.0519997	3.48437	0.754986	0.00638419	0.427788	0.0926923	67.0075	14.519	0.216678
800	5.2	0.527069	55.0769	2.30938	8.19633	9.86588	0.0944135	2.25169	0.63443	0.00956969	0.22823	0.0643054	23.8492	6.7197	0.281758
800	2.3	0.497231	59.1834	1.38366	9.50399	4.62561	0.0388622	1.66226	0.242004	0.00840153	0.359359	0.0523182	42.773	6.22722	0.145588
800	4.3	0.711775	64.7686	1.49921	9.19814	6.04124	0.0663902	2.86817	0.467486	0.0109895	0.474766	0.0773825	43.2018	7.04149	0.162991
800	2.2	0.381818	70.9852	0.819974	5.36615	5.63096	0.030288	2.62203	0.40066	0.00537884	0.465646	0.0711531	86.5701	13.2283	0.152805
900	2.1	0.519143	47.6694	1.27768	3.99539	3.9989	0.0435499	1.62482	0.519599	0.0108905	0.406316	0.129935	37.3093	11.9311	0.319789
900	2.8	0.519584	47.3755	1.39584	4.22492	5.42934	0.0595455	2.021	0.667705	0.0109674	0.372237	0.122981	33.9404	11.2134	0.330383
900	4.3	0.241843	53.236	1.87561	6.42891	17.5899	0.0799083	2.26806	0.661698	0.00454284	0.128941	0.037618	28.3833	8.28073	0.291747
900	4.7	0.736317	52.6551	1.16298	7.56556	6.33694	0.0886143	4.01212	0.616742	0.0139838	0.633132	0.0973249	45.2762	6.95985	0.15372
900	5.2	0.261973	50.8964	0.973068	5.51531	19.796	0.101893	5.32953	0.940292	0.00514717	0.269223	0.0474991	52.3051	9.2282	0.17643
Soil B (20-40cm)
elevation	N	P	K	Ca	Mg	N:P	N:K	N:Ca	N:Mg	P:K	P:Ca	P:Mg	K:Ca	K:Mg	Ca:Mg
500	1.6	0.285048	60.0148	1.53791	4.75266	5.61309	0.0266601	1.04038	0.336654	0.00474963	0.185348	0.0599766	39.0237	12.6276	0.323589
500	1.9	0.98005	67.2484	2.94747	16.7569	1.93868	0.0282535	0.64462	0.113386	0.0145736	0.332505	0.0584862	22.8156	4.01317	0.175896
500	1.2	0.824667	56.4786	1.33218	9.42422	1.45513	0.021247	0.900781	0.127332	0.0146014	0.619037	0.0875051	42.3957	5.99292	0.141357
600	1.6	0.412687	118.922	1.89308	7.58082	3.87703	0.0134542	0.845182	0.211059	0.00347022	0.217997	0.0544383	62.8194	15.6873	0.24972
600	1.4	0.263849	97.0564	1.12584	4.25395	5.30607	0.0144246	1.24352	0.329106	0.00271851	0.234358	0.0620244	86.2081	22.8156	0.264657
600	1.3	0.653053	112.287	1.25159	14.018	1.99065	0.0115774	1.03868	0.0927377	0.0058159	0.521778	0.0465866	89.7158	8.01022	0.0892844
600	1.2	0.282074	101.601	0.686695	10.0009	4.25421	0.0118109	1.7475	0.119989	0.00277628	0.41077	0.0282048	147.957	10.1592	0.0686632
600	1.9	0.369787	65.8397	0.905654	5.71543	5.13809	0.028858	2.09793	0.332434	0.00561649	0.40831	0.0646999	72.6985	11.5196	0.158458
700	2	0.237337	54.5879	0.656013	4.09253	8.42685	0.0366381	3.04872	0.488696	0.00434778	0.361786	0.0579927	83.2117	13.3384	0.160295
700	1.4	0.210699	52.7209	0.893303	4.28567	6.64454	0.0265549	1.56722	0.32667	0.0039965	0.235865	0.0491636	59.018	12.3017	0.208439
700	0.9	0.257121	51.3374	0.815086	6.03891	3.5003	0.0175311	1.10418	0.149034	0.00500845	0.315452	0.0425774	62.9841	8.50112	0.134972
700	1.4	0.262129	48.5231	0.551914	3.09021	5.34088	0.0288523	2.53663	0.453043	0.00540215	0.474945	0.0848255	87.9178	15.7022	0.178601
700	0.9	0.187274	49.5178	0.8725	4.03359	4.80579	0.0181753	1.03152	0.223126	0.00378196	0.214641	0.0464287	56.7539	12.2764	0.216308
800	2.9	0.355342	67.0712	0.871919	4.60397	8.16115	0.0432376	3.326	0.629891	0.00529798	0.40754	0.0771816	76.9237	14.5681	0.189384
800	2.1	0.584308	71.7134	1.96584	10.4745	3.59399	0.0292832	1.06825	0.200486	0.00814782	0.297231	0.0557837	36.4798	6.84645	0.187678
800	2	0.516754	64.1726	1.57006	9.12416	3.87032	0.0311659	1.27383	0.219198	0.00805256	0.329129	0.0566358	40.8726	7.03326	0.172078
800	2.1	0.630583	55.945	1.11765	7.70366	3.33025	0.0375369	1.87894	0.272598	0.0112715	0.564203	0.0818549	50.0558	7.26213	0.145081
800	1.05	0.308062	75.6925	0.892427	5.07889	3.4084	0.0138719	1.17657	0.206738	0.00406991	0.345196	0.0606554	84.8165	14.9034	0.175713
900	2.333	0.339779	59.1675	0.937555	4.69455	6.86623	0.0394304	2.48839	0.496959	0.00574266	0.36241	0.0723773	63.1084	12.6034	0.199711
900	3.248	0.452644	55.7651	0.959639	4.62324	7.17562	0.0582443	3.38461	0.702538	0.00811697	0.471682	0.0979062	58.1105	12.0619	0.207568
900	4.82	0.207392	49.6137	0.896119	6.51044	23.241	0.0971506	5.37875	0.740349	0.00418014	0.231434	0.0318554	55.3651	7.62064	0.137643
900	4.975	0.268906	54.888	0.804356	8.9582	18.5009	0.0906391	6.18507	0.555357	0.00489918	0.334313	0.0300179	68.2385	6.12712	0.0897899
900	5.841	0.227842	55.0058	0.771556	6.02789	25.6362	0.106189	7.57041	0.968996	0.00414215	0.295302	0.037798	71.2919	9.12521	0.127998
Soil C (40-60cm)
elevation	N	P	K	Ca	Mg	N:P	N:K	N:Ca	N:Mg	P:K	P:Ca	P:Mg	K:Ca	K:Mg	Ca:Mg
500	1.2	0.337664	55.0409	2.36241	3.9278	3.55382	0.021802	0.507956	0.305515	0.00613479	0.142932	0.0859679	23.2986	14.0132	0.601459
500	0.8	0.668097	36.469	1.58387	5.05339	1.19743	0.0219365	0.505091	0.15831	0.0183196	0.421813	0.132208	23.0252	7.21674	0.313428
500	1	0.563786	52.6753	2.1211	6.50402	1.77372	0.0189842	0.471453	0.153751	0.010703	0.265799	0.0866826	24.834	8.09889	0.326121
600	1.5	0.40828	127.908	1.69211	12.2427	3.67395	0.0117272	0.886465	0.122522	0.00319198	0.241284	0.0333487	75.5907	10.4477	0.138214
600	1.1	0.456698	90.8841	1.48448	4.52272	2.4086	0.0121033	0.740998	0.243217	0.00502506	0.307647	0.100979	61.2226	20.095	0.328229
600	2.5	0.539951	80.8508	1.047	7.26149	4.63005	0.0309212	2.38778	0.344282	0.00667836	0.515713	0.0743581	77.2215	11.1342	0.144185
600	1.4	0.191928	108.354	0.645826	10.655	7.29438	0.0129207	2.16777	0.131394	0.00177132	0.297183	0.018013	167.775	10.1693	0.0606124
600	2.4	0.375036	67.0558	0.619071	5.04011	6.39938	0.0357911	3.87678	0.47618	0.0055929	0.605805	0.0744104	108.317	13.3044	0.122829
700	0.9	0.191642	64.8576	0.69926	4.85317	4.69625	0.0138766	1.28707	0.185446	0.00295482	0.274064	0.0394881	92.7518	13.364	0.144083
700	1.6	0.187626	50.4417	0.880265	4.02915	8.52761	0.0317198	1.81763	0.397106	0.00371965	0.213147	0.0465671	57.3029	12.5192	0.218474
700	1.2	0.382779	75.7091	0.834287	5.90065	3.13497	0.0158501	1.43835	0.203367	0.00505592	0.458809	0.0648706	90.747	12.8306	0.141389
700	1.7	0.257153	28.001	0.569071	1.79888	6.61084	0.060712	2.98732	0.945033	0.00918371	0.451883	0.142952	49.2048	15.5658	0.316347
700	1.5	0.0914504	44.6939	0.768999	3.81174	16.4023	0.0335616	1.95059	0.393521	0.00204615	0.118921	0.0239918	58.1196	11.7253	0.201745
800	1.5	0.232204	60.949	0.814508	4.70245	6.45983	0.0246108	1.8416	0.318983	0.00380982	0.285086	0.0493794	74.8292	12.9611	0.173209
800	1.8	0.385344	66.8822	2.29216	11.3133	4.67115	0.026913	0.785285	0.159104	0.00576153	0.168114	0.034061	29.1787	5.9118	0.202607
800	2.2	0.476231	62.041	1.86528	9.50606	4.61961	0.0354604	1.17945	0.231431	0.00767607	0.255314	0.0500976	33.261	6.52647	0.19622
800	5	0.270451	64.7907	0.644531	8.68794	18.4876	0.0771716	7.75758	0.57551	0.00417422	0.419609	0.0311294	100.524	7.45754	0.0741868
800	2.751	0.239052	63.2907	0.715047	6.12125	11.508	0.0434661	3.8473	0.449418	0.00377705	0.334316	0.0390528	88.5126	10.3395	0.116814
900	2.753	0.22328	57.8061	0.750447	4.52341	12.3298	0.0476248	3.66848	0.608612	0.00386256	0.297529	0.0493609	77.0288	12.7793	0.165903
900	3.642	0.344178	63.1976	0.776126	5.0988	10.5817	0.0576288	4.69253	0.714286	0.00544607	0.443457	0.0675018	81.4269	12.3946	0.152217
900	5	0.51178	52.539	0.906915	6.6239	9.76983	0.0951673	5.5132	0.754842	0.00974094	0.564308	0.0772626	57.9316	7.93174	0.136916
900	3.929	0.569061	53.1971	0.914059	8.02486	6.90435	0.0738574	4.29841	0.489604	0.0106972	0.622565	0.0709123	58.1988	6.62904	0.113903
900	6.408	0.648518	51.9849	1.09237	5.42009	9.881	0.123267	5.86617	1.18227	0.0124751	0.593682	0.119651	47.5893	9.59115	0.20154

## Sheet: Biomass
Elevation	TH	DBH	Area	volume（m³）	volume per ha	biomass（ton/ha.）
500	13	14	0.015386	0.492352	5.47058	3.61058
500	11	13	0.0132665	0.371462	4.12736	2.72405
500	13	14.5	0.0165046	0.528148	5.86831	3.87309
600	14.5	16	0.020096	0.70336	7.81511	5.15797
600	11.5	16.4	0.0211134	0.612287	6.80319	4.49011
600	16.5	17.7	0.0245933	0.959137	10.6571	7.03367
600	16.5	17.5	0.0240406	0.937584	10.4176	6.87562
600	13	17.7	0.0245933	0.786984	8.74427	5.77122
700	14	20.1	0.0317148	1.0783	11.9811	7.90755
700	10.5	9.9	0.00769378	0.207732	2.30814	1.52337
700	11.5	15.6	0.0191038	0.554009	6.15566	4.06273
700	15.5	14.2	0.0158287	0.585663	6.50737	4.29486
700	10	11.3	0.0100237	0.260615	2.89573	1.91118
800	11	14.6	0.0167331	0.468526	5.20584	3.43585
800	7.5	11.5	0.0103816	0.218014	2.42238	1.59877
800	8.5	11.1	0.00967198	0.222456	2.47173	1.63134
800	12.5	16.1	0.020348	0.630788	7.00875	4.62578
800	9.5	11.7	0.0107459	0.268647	2.98496	1.97008
900	9.5	10.3	0.00832807	0.208202	2.31335	1.52681
900	10.5	10.9	0.00932659	0.251818	2.79798	1.84666
900	11.2	12	0.011304	0.321034	3.56704	2.35425
900	8.6	9.5	0.00708462	0.164363	1.82626	1.20533
900	9.2	10.2	0.00816714	0.199278	2.2142	1.46137

## Sheet: Envi
ELE	Soil Temperature	Soil Moisture	Soil pH
500	17.4	13.1798	5.23
500	16.6	16.542	5.57
500	17.4	12.6393	5.21
600	16.7	14.1681	4.91
600	17.8	15.3162	4.69
600	18.9	15.0477	4.9
600	18.3	16.0367	4.55
600	17.925	19.3287	4.58
700	16.5	16.544	4.7
700	16.9	14.8529	4.47
700	16.1	12.2057	4.97
700	16	15.9778	4.59
700	16.52	10.5199	4.63
800	16.5	11.154	4.83
800	15.8	10.8522	3.94
800	16.1	16.4008	4.65
800	16.6	14.4397	4.13
800	16.42	12.3664	4.57
900	14.3	21.0896	4.53
900	14.8	21.1997	4.73
900	15.1	15.5257	4.41
900	14.6	20.151	4.99
900	14.7	16.1434	4.86
